# Supplementary material
Source: PubMed Central journal article supplement (PMC548829)
Supplement: plntcell_tpc.104.028035_1.pdf [file plntcell_tpc.104.028035_1.pdf]

Analysis of proline codon usage in HRGPs of *Chlamydomonas reinhardtii*.

|                | number of codons-a | %GC -b | %GC if normal bias -c | %GC 3rd position -d | number of proline codons | % prolines | %CCG/C | %CCG | %CCC | %CCA | %CCT |
|----------------|--------------------|--------|-----------------------|---------------------|--------------------------|------------|--------|------|------|------|------|
| Chlamy average | 127,008            | 65     | 65                    | 86                  | 7392                     | 6          | 80     | 31   | 49   | 8    | 12   |
| SAD1 shaft     | 873                | 74     | 83                    | 56                  | 526                      | 60         | 51     | 26   | 25   | 20   | 29   |
| SAD1 N-term    | 612                | 62     | 64                    | 82                  | 42                       | 7          | 74     | 36   | 38   | 19   | 7    |
| SAD1 head      | 2404               | 72     | 74                    | 78                  | 221                      | 9          | 70     | 36   | 34   | 13   | 17   |
| SAG1 shaft     | 934                | 80     | 84                    | 70                  | 560                      | 60         | 66     | 33   | 33   | 10   | 24   |
| SAG1 N-term    | 469                | 63     | 65                    | 79                  | 37                       | 8          | 67     | 32   | 35   | 27   | 5    |
| SAG1 head      | 2006               | 73     | 74                    | 80                  | 167                      | 8          | 81     | 54   | 27   | 11   | 8    |
| GP1 shaft      | 342                | 79     | 84                    | 66                  | 208                      | 61         | 64     | 16   | 48   | 3    | 34   |
| GP1 rest       | 213                | 65     | 65                    | 88                  | 14                       | 7          | 79     | 0    | 79   | 0    | 21   |
| MTA2 shaft     | 166                | 78     | 83                    | 66                  | 100                      | 60         | 62     | 27   | 35   | 17   | 21   |
| MTA2 rest      | 220                | 61     | 65                    | 75                  | 12                       | 6          | 59     | 17   | 42   | 7    | 25   |
| GAS28 shaft    | 61                 | 79     | 85                    | 64                  | 39                       | 64         | 61     | 10   | 51   | 0    | 38   |
| GAS28 rest     | 385                | 63     | 64                    | 83                  | 22                       | 6          | 78     | 14   | 64   | 9    | 14   |
| VSP1 shaft     | 190                | 70     | 73                    | 77                  | 61                       | 32         | 70     | 26   | 44   | 8    | 21   |
| VSP1 rest      | 110                | 66     | 70                    | 74                  | 4                        | 4          | 50e    | 25   | 25   | 25   | 25   |

|            | number of codons-a | %GC -b | %GC if normal bias -c | %GC 3rd position -d | number of proline codons | % prolines | %CCG/C           | %CCG | %CCC | %CCA | %CCT |
|------------|--------------------|--------|-----------------------|---------------------|--------------------------|------------|------------------|------|------|------|------|
| VSP3 shaft | 203                | 69     | 76                    | 64                  | 90                       | 44         | 65               | 17   | 48   | 1    | 34   |
| VSP3 rest  | 270                | 63     | 64                    | 83                  | 9                        | 3          | 78               | 11   | 67   | 0    | 22   |
| VSP4 shaft | 66                 | 80     | 78                    | 89                  | 34                       | 52         | 88               | 32   | 56   | 6    | 6    |
| VSP4 rest  | 925                | 65     | 64                    | 89                  | 58                       | 6          | 94               | 34   | 60   | 3    | 2    |
| ZSP1 shaft | 123                | 73     | 74                    | 81                  | 42                       | 34         | 81               | 29   | 52   | 5    | 14   |
| ZSP1 rest  | 79                 | 69     | 72                    | 79                  | 1                        | 1          | 100 <sup>e</sup> | 100  | 0    | 0    | 0    |
| GP2 shaft  | 241                | 79     | 85                    | 65                  | 167                      | 69         | 60               | 19   | 41   | 0    | 40   |
| GP2 rest   | 1017               | 65     | 65                    | 86                  | 85                       | 8          | 79               | 14   | 65   | 1    | 20   |

Abbreviations:

- a) number of codons in the indicated gene region
- b) GC content of the mRNA segment(s) coding for the indicated gene region
- c) the calculated GC content for the mRNA if the codons for all amino acids had been used in the same proportions as in an average *Chlamydomonas* gene
- d) % of codons that have a G or a C in the third position
- e) too few prolines for the result to be meaningful

Source of data:

Chlamy average: A compilation of *Chlamydomonas reinhardtii* genes obtained from a codon usage database maintained by the Kazusa DNA Research Institute, <http://www.kazusa.or.jp>

**VSP1 L16461**

**VSP3 L29029**

**VSP4 AY036106**

**ZSP1 S44199**

**GP2 AY596305**

**GAS28 AF015883**

**GP1 AF309494**

**MTA2 AF309495**

**SAG1 AY450930**

**SAD1 AY450929**

Further notes:

The codon usage has been determined separately for the proline-rich portion (termed “shaft”) of each protein (which combines several segments in some proteins) and for the remainder of the protein (termed “rest”). For the two agglutinin proteins (SAG1 and SAD1) the head domain and the N-terminal domain were calculated separately.

Codon usage in *Chlamydomonas reinhardtii* is biased, and favors codons ending in G or C over those ending in A or T (86% of the time), consistent with the overall GC richness of coding regions (on average 65.4% GC). In regions rich in proline codons (CCN), as are found in HRGPs, this could lead to extremely high GC contents. For example, a region of 100 prolines would, on average, contain only 8 CCA and 12 CCT codons, resulting in a GC content of 280/300 or 93%. The data document that codon bias in the proline rich regions of cell wall and agglutinin genes is attenuated, with far more CCA and CCT codons used than expected. For example, the *minus* agglutinin shaft, which is 60% proline codons, has a GC content of 74%. This is, however, less than the GC content would be if the codon usage were typical of an average *C. reinhardtii* gene, in which case the GC content would have been 83% (these calculations are done for the codons of all the amino acids in the given region, not just the prolines). Thus the frequency of GC in the third position of all codons is only 56% rather than the usual 86%, and only 51% of proline codons end in G/C, rather than the usual 80%. This effect is not necessarily restricted to proline codons: for example, alanine codons (GCN), which are also GC rich, end in G or C 77% of the time on average, but 24% of the time in the SAD1 shaft (not shown).

The reduced 3<sup>rd</sup> position GC content is seen in all the proteins with long proline-rich shafts (i.e. SAD1, SAG1, GP1, MTA2, and GP2; all > 60% prolines). The shaft region of GAS28 is shorter but quite proline-rich, and also shows the effect.

The effect is less consistent in shafts of lower proline content. The 3<sup>rd</sup> position GC content for proline in VSP4, which has a short shaft of alternating serine and proline, is actually above average. In ZSP1 the effect is not seen perhaps because the shaft is fairly short. There is some effect in VSP1 and VSP3, whose shafts, while only 30-40% proline, are of greater length than those of ZSP1 and VSP4.
